# Supplementary material
Source: PubMed Central journal article supplement (PMC6811861)
Supplement: ao9b02031_si_001.pdf [file ao9b02031_si_001.pdf]

# Supporting Information for:

## **g-C<sub>3</sub>N<sub>4</sub>-Mediated Synthesis of Cu<sub>2</sub>O To Obtain Porous Composites with Improved Visible Light Photocatalytic Degradation of Organic Dyes**

**Ganesh Reddy Surikanti<sup>†‡§</sup>, Pooja Bajaj<sup>†‡§</sup> and Manorama V Sunkara<sup>\*†‡</sup>**

Nanomaterials Laboratory, Department of Polymers and Functional Materials,  
CSIR-Indian Institute of Chemical Technology, Uppal Road, Tarnaka, Hyderabad-500 007  
and

Academy of Scientific and Innovative Research (AcSIR), Ghaziabad- 201002, India.

<sup>†‡§</sup>*Equally contributing authors*

<sup>\*†‡</sup>*To whom all Correspondences should be addressed.*

**E-mail:** [manorama@iict.res.in](mailto:manorama@iict.res.in) and [manorama@csiriict.in](mailto:manorama@csiriict.in) (Manorama V Sunkara), **Tel.:** +91 40 27193225; **Fax:** +91 40 27193991.

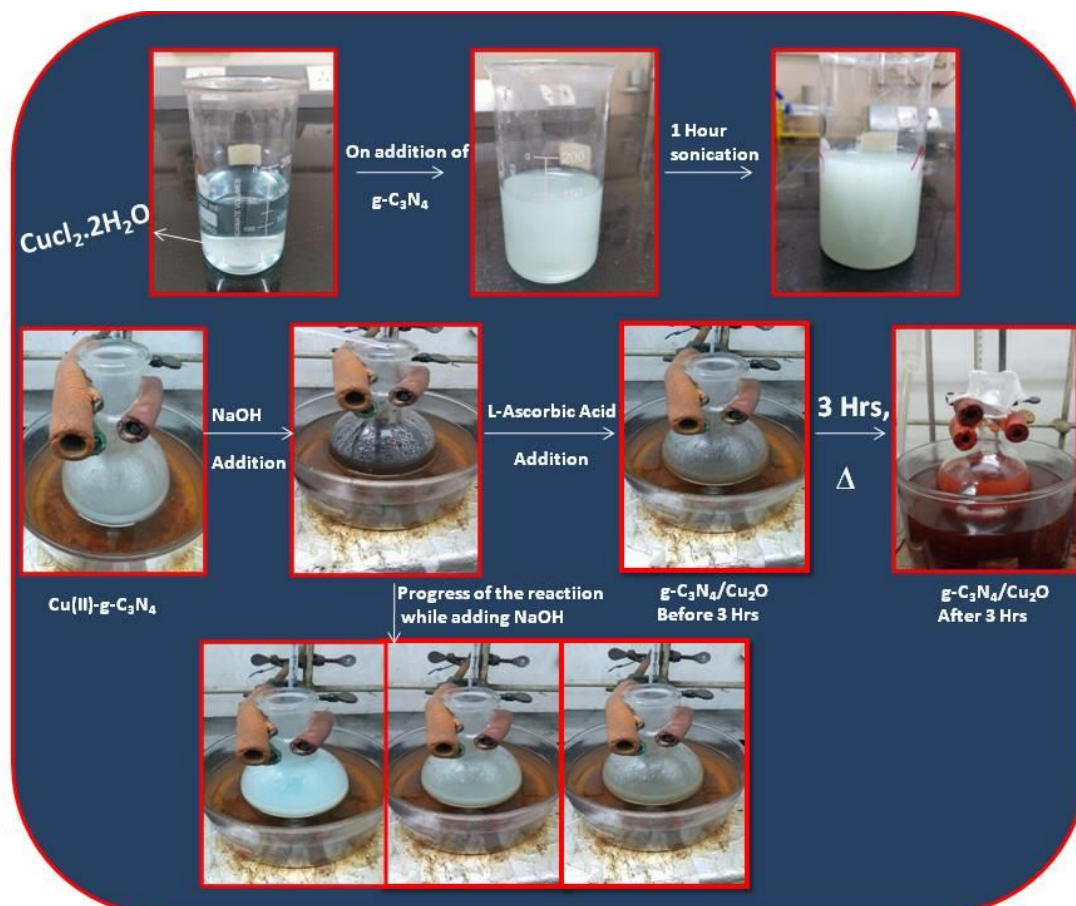

**Figure S1:** Pictorial representation of reaction with the sequence of color changes for the formation of  $g\text{-C}_3\text{N}_4/\text{Cu}_2\text{O}$  composite.

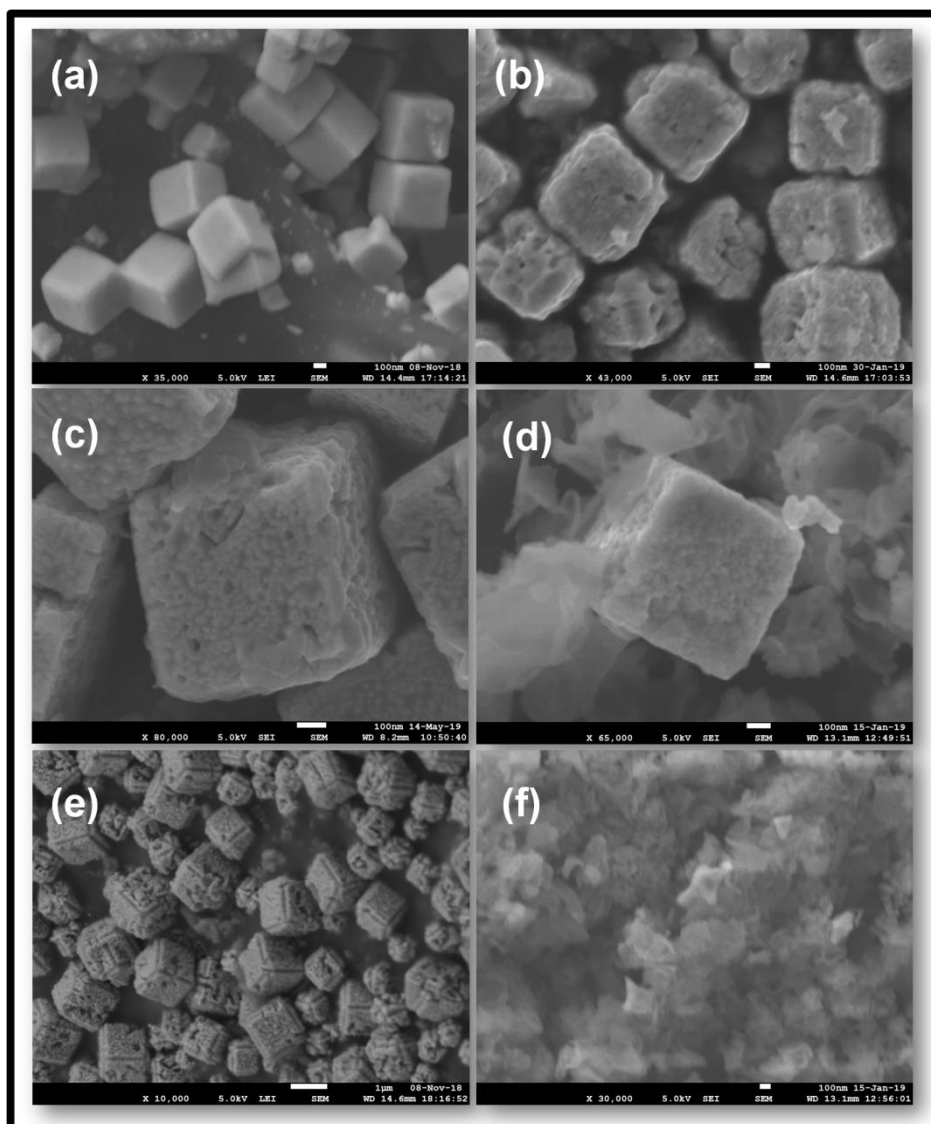

**Figure S2:** FE-SEM images of as synthesized (a) CN/Cu-1 (b) Cu-CN-2 (c) CN/Cu-3 (d) CN/Cu-4 (e) CN/Cu-5 and (f) CN/Cu-6 composites.

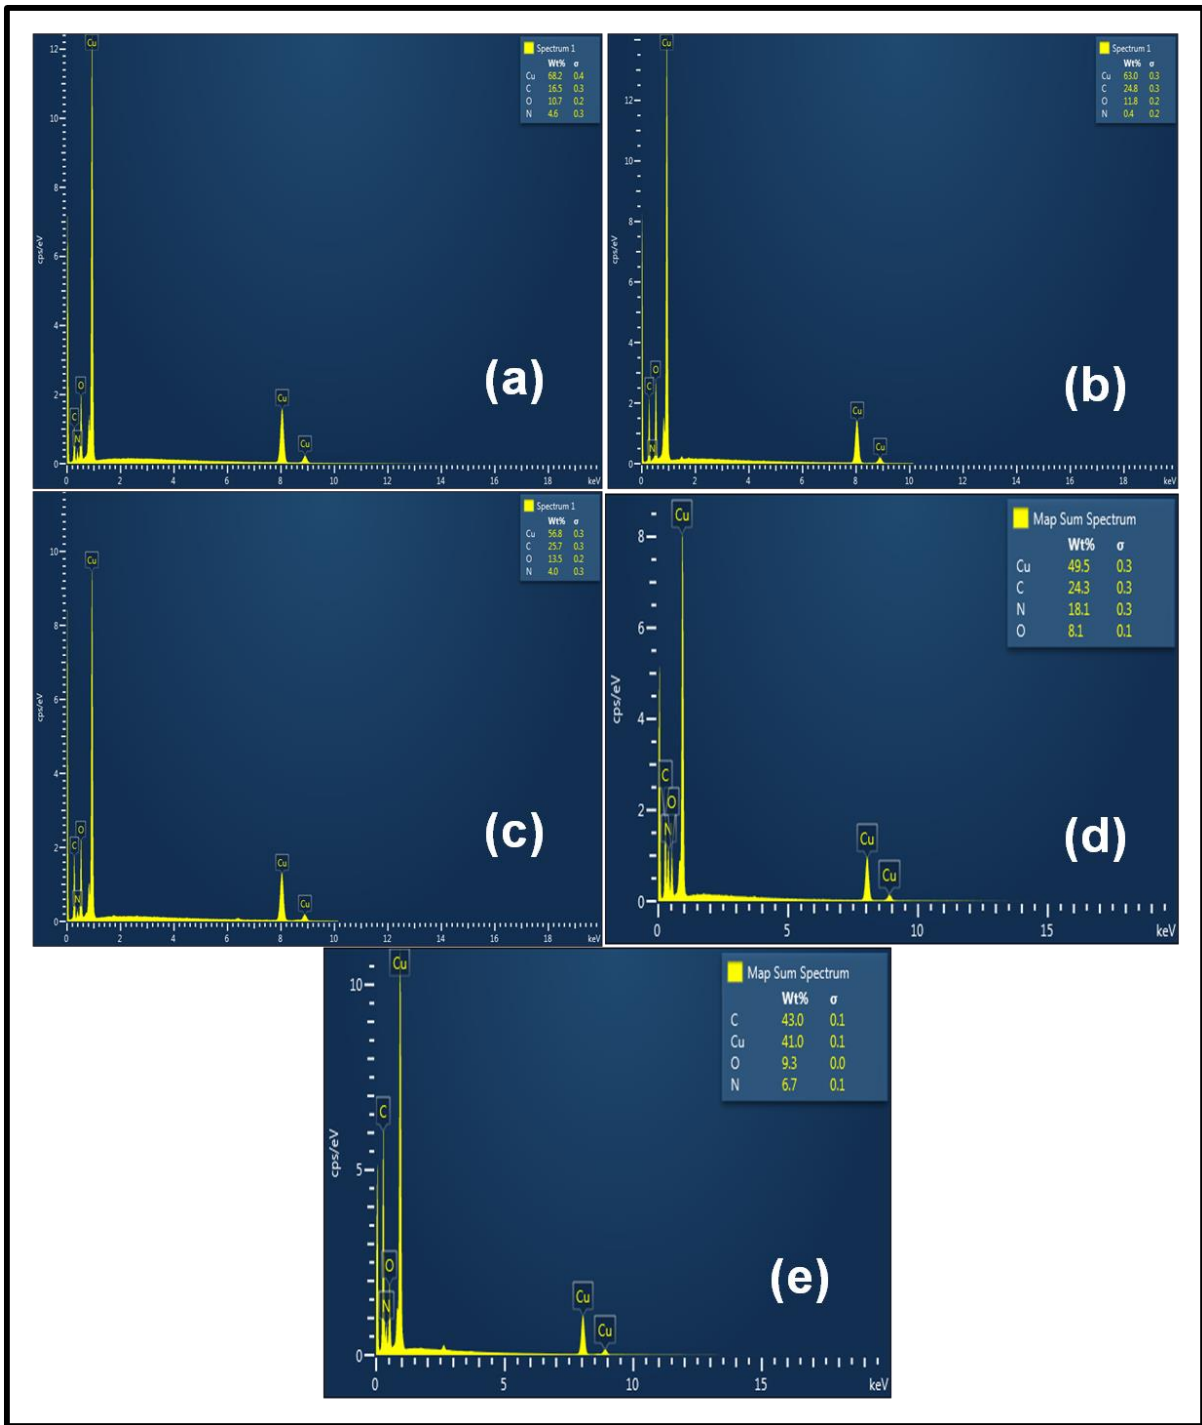

**Figure S3:** EDS data of the synthesized (a) CN/Cu-1 (b) CN/Cu-2 (c) CN/Cu-3 (d) CN/Cu-4 and (e) CN/Cu-6 composites.

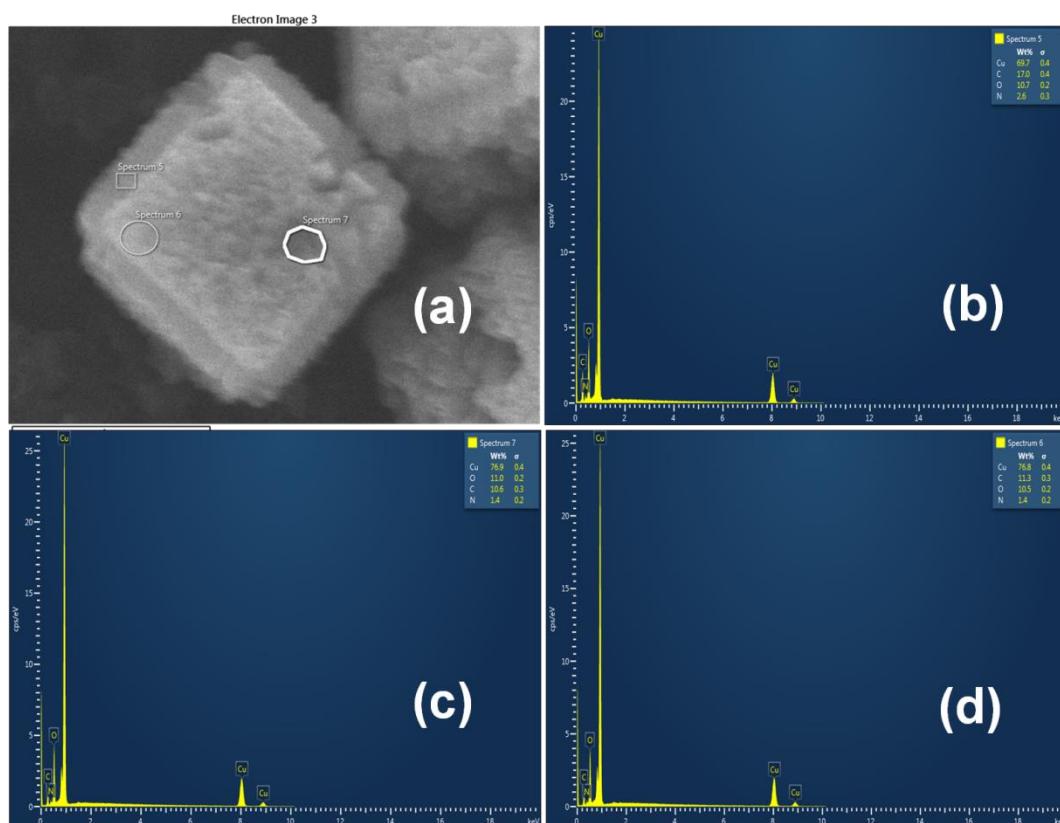

**Figure S4:** (a) Point id image of CN/Cu-5 catalyst showing three different locations and their corresponding EDS data are (b) Spectrum 1 (c) Spectrum 2 and (d) Spectrum 3.

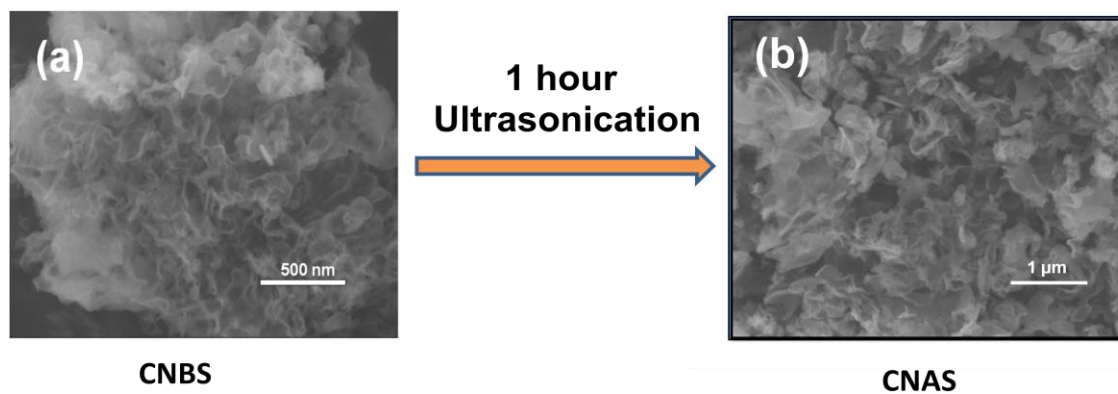

**Figure S5:** FE-SEM images of as synthesized g-C<sub>3</sub>N<sub>4</sub> (a) before sonication (CNBS) and (b) after one hour sonication (CNAS).

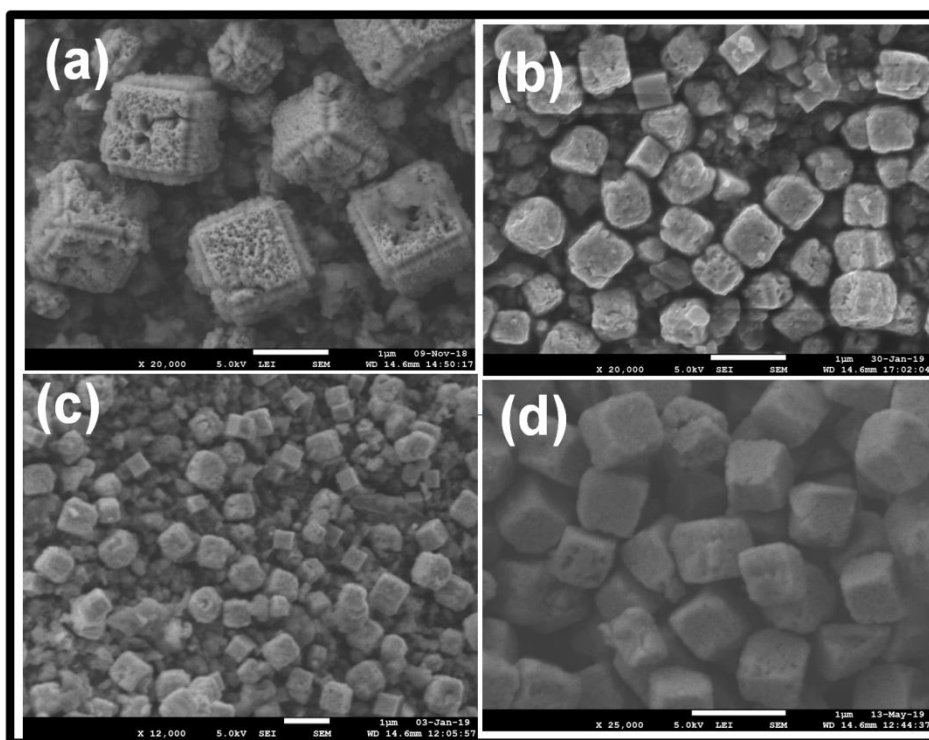

**Figure S6:** FESEM images of CN/Cu-5 catalyst as a function of temperature variation (a) 60°C (b) 70°C (c) 80°C and (d) 90°C respectively.

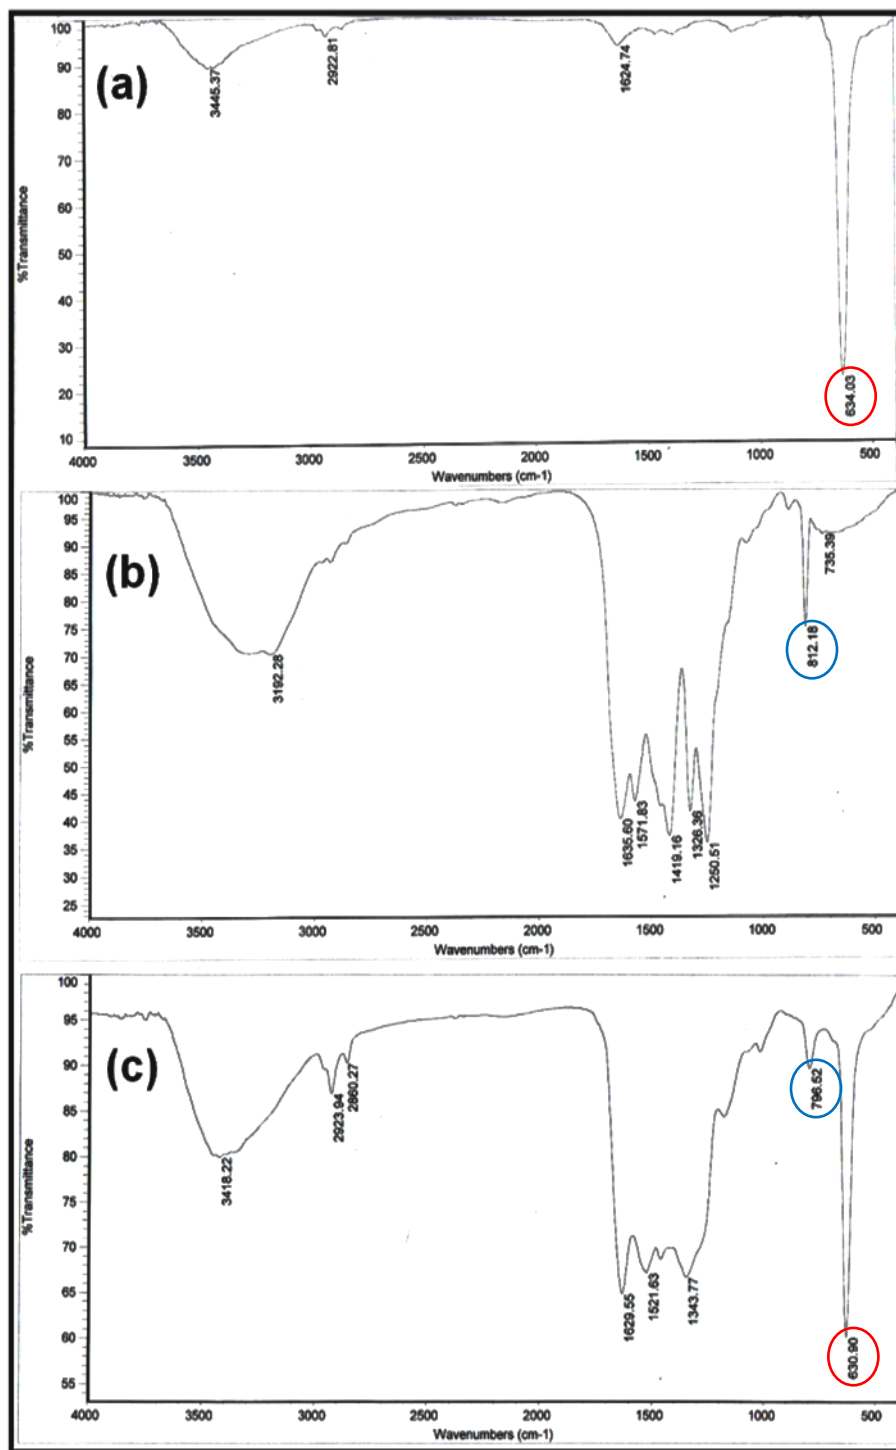

Figure S7: FT-IR spectra of as synthesized (a) Cu<sub>2</sub>O (b) g-C<sub>3</sub>N<sub>4</sub> and (c) CN/Cu-5 composite.

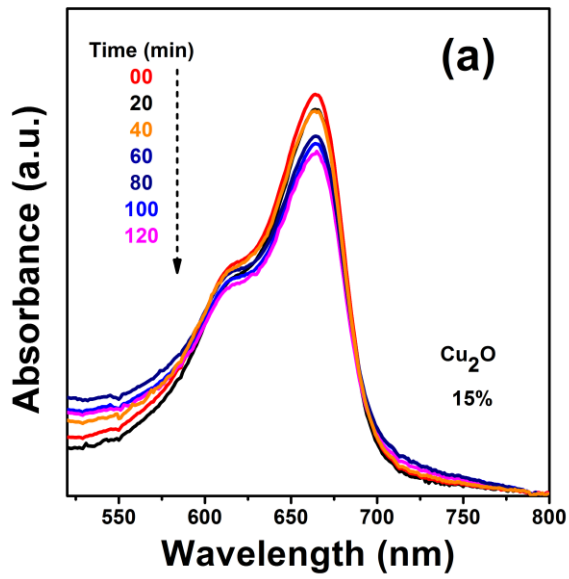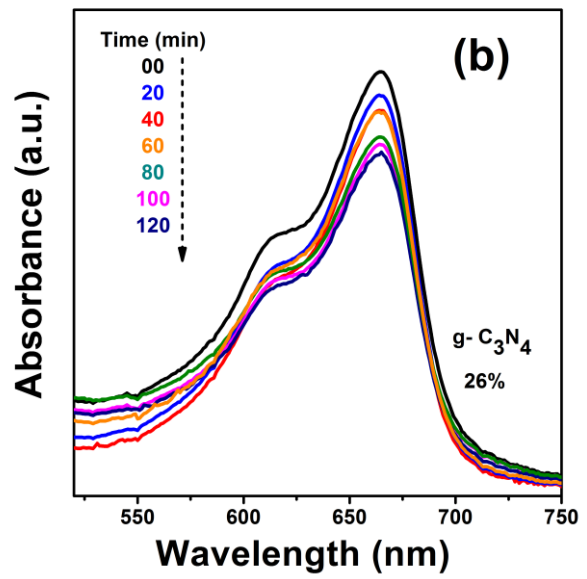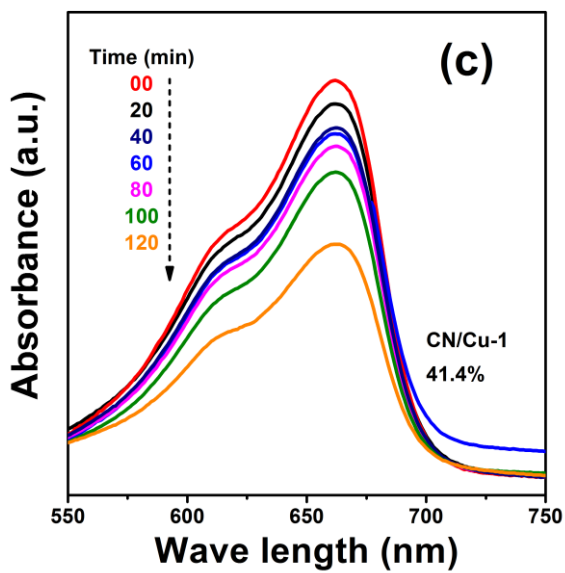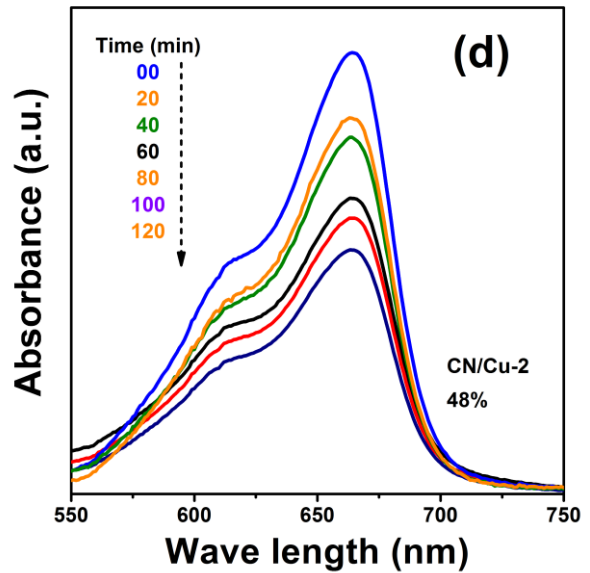



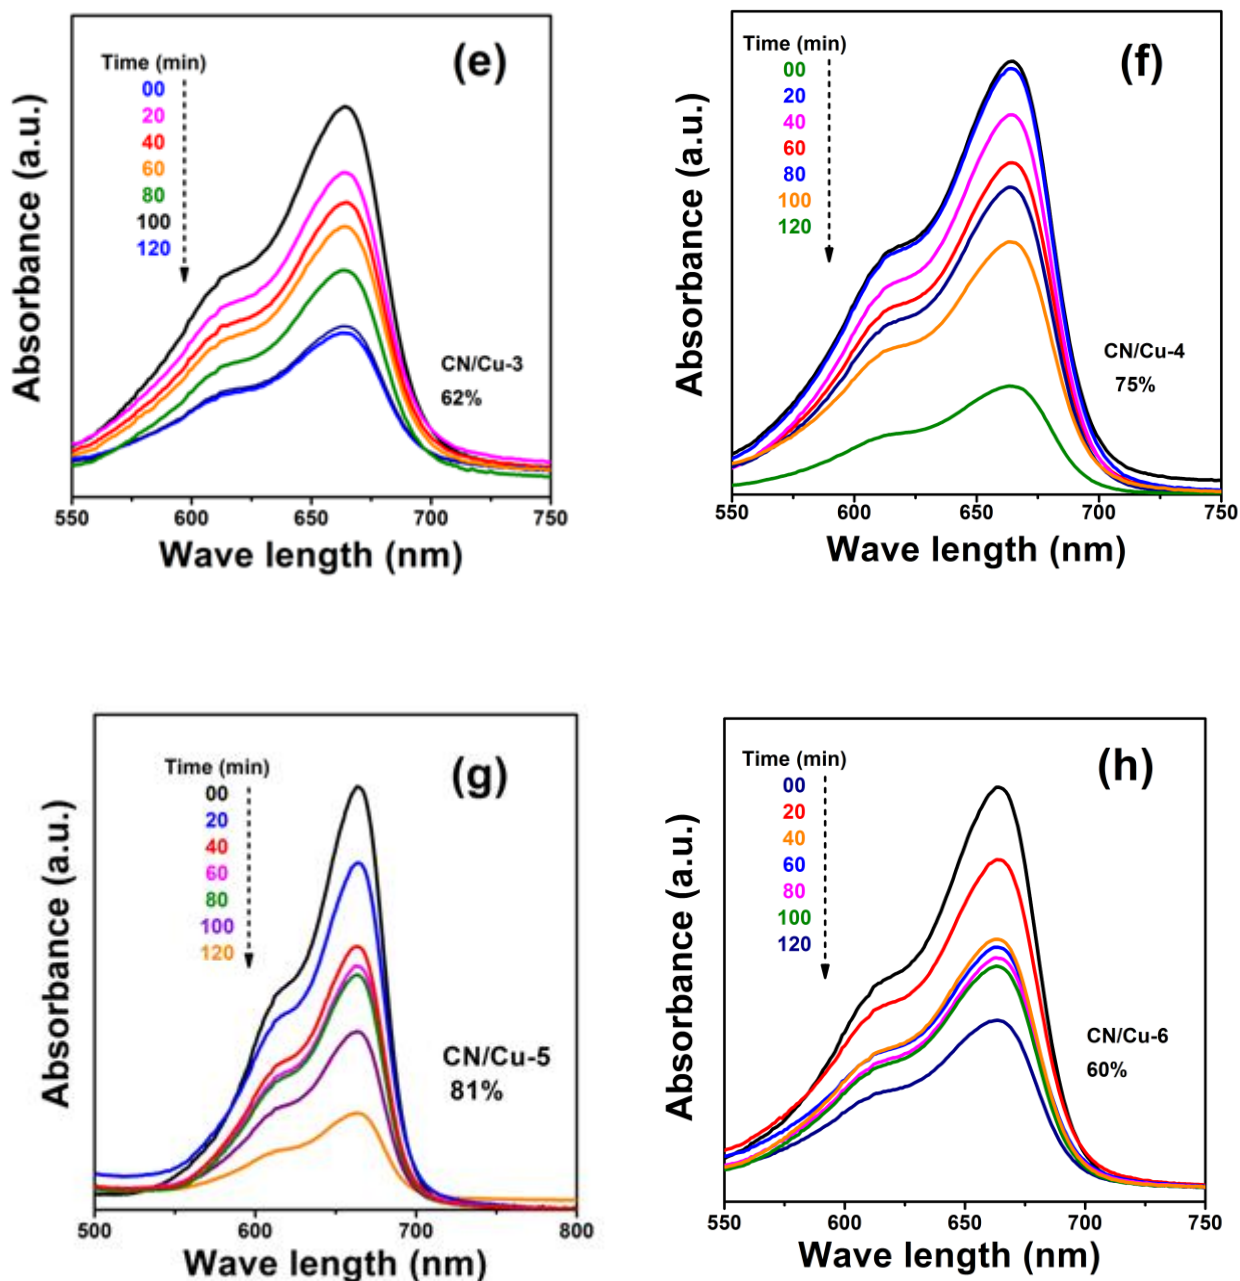

**Figure S8:** UV-Visible absorbance of Methylene Blue dye degradation with (a)  $\text{Cu}_2\text{O}$  (b)  $\text{g-C}_3\text{N}_4$  (c) CN/Cu-1 (d) CN/Cu-2 (e) CN/Cu-3 (f) CN/Cu-4 (g) CN/Cu-5 and (h) CN/Cu-6 catalyst under visible light irradiation for 120 min.

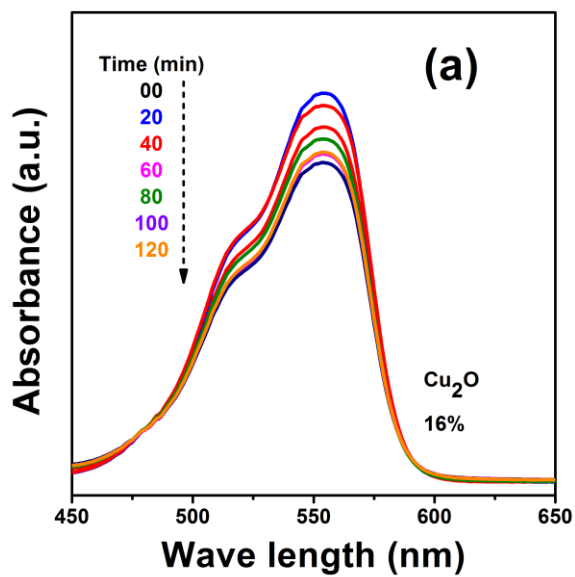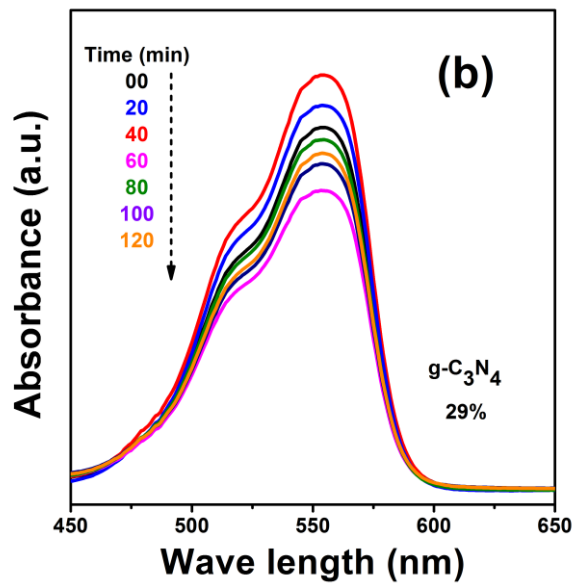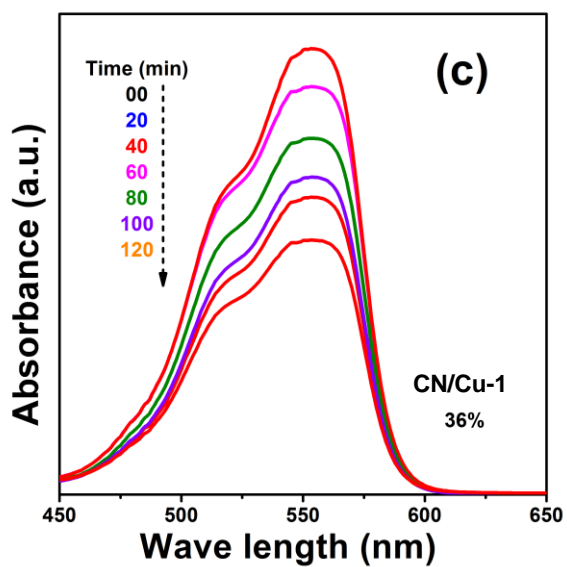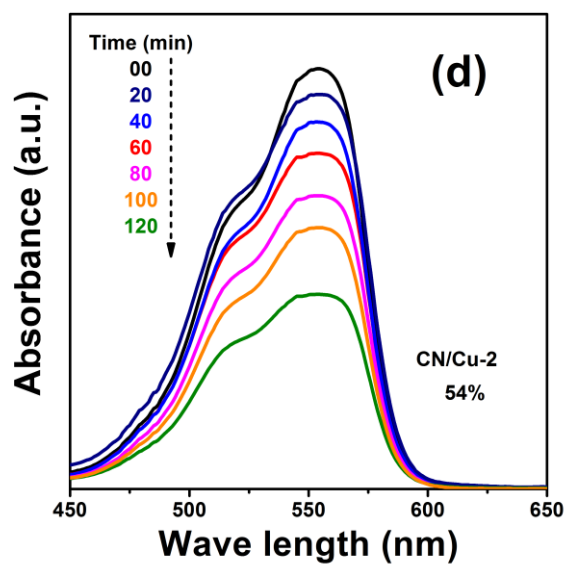

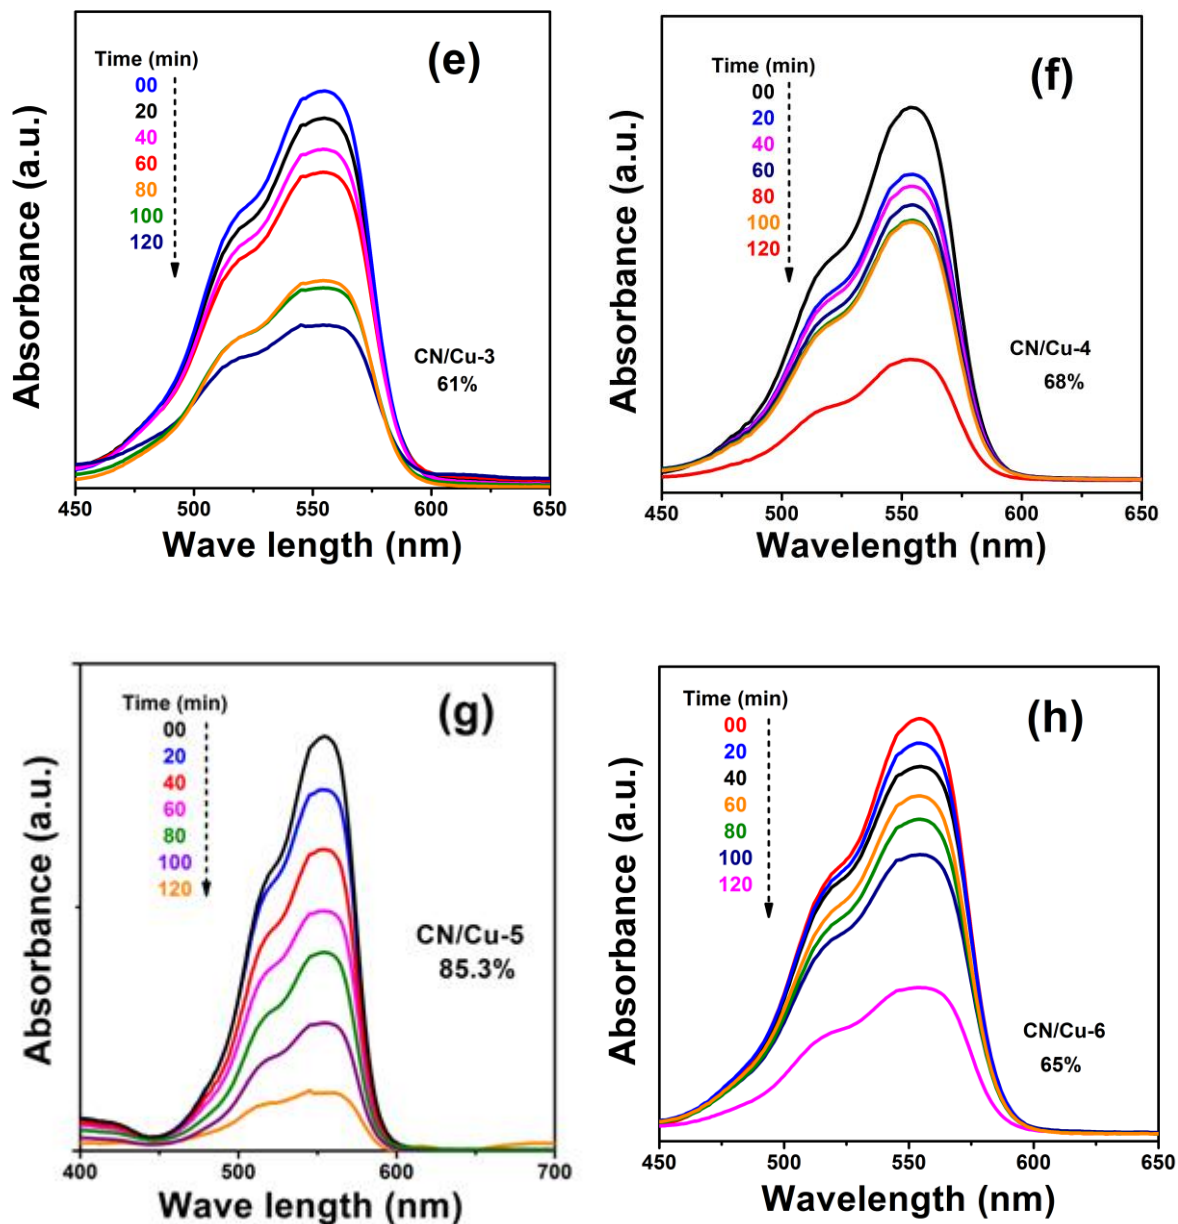

**Figure S9:** UV-Visible absorbance of Rhodamine-B dye with (a)  $\text{Cu}_2\text{O}$  (b)  $\text{g-C}_3\text{N}_4$  (c) CN/Cu-1 (d) CN/Cu-2 (e) CN/Cu-3 (f) CN/Cu-4 (g) CN/Cu-5 and (h) CN/Cu-6 catalyst under visible light irradiation for 120 min.

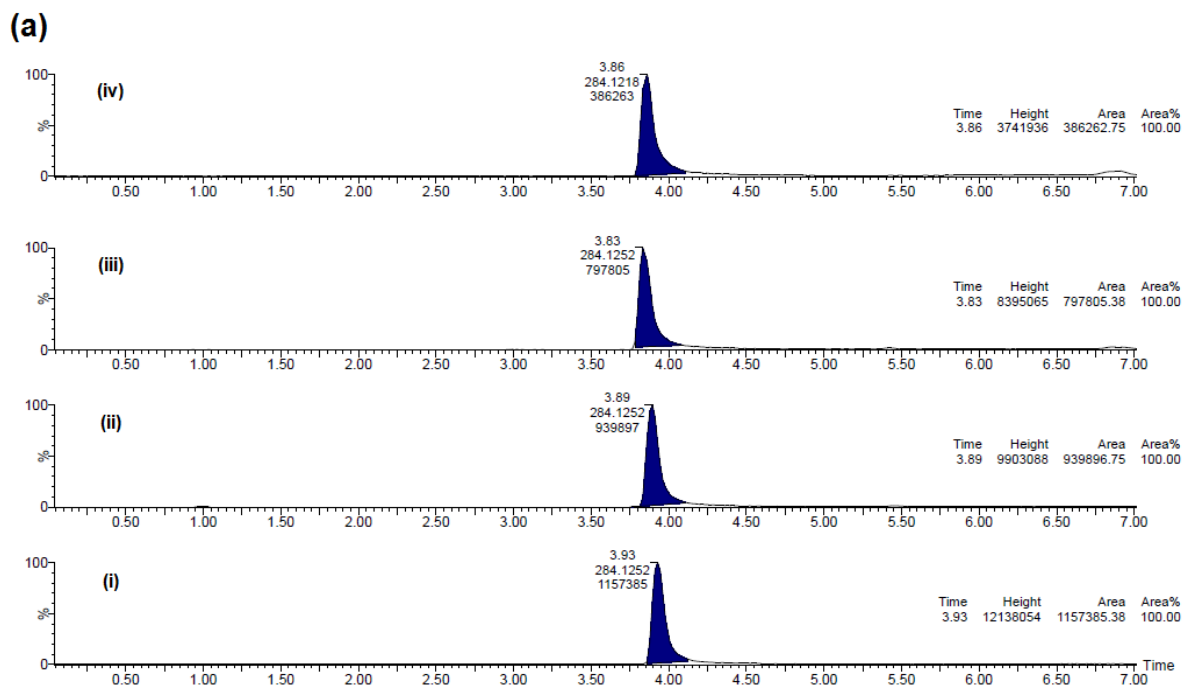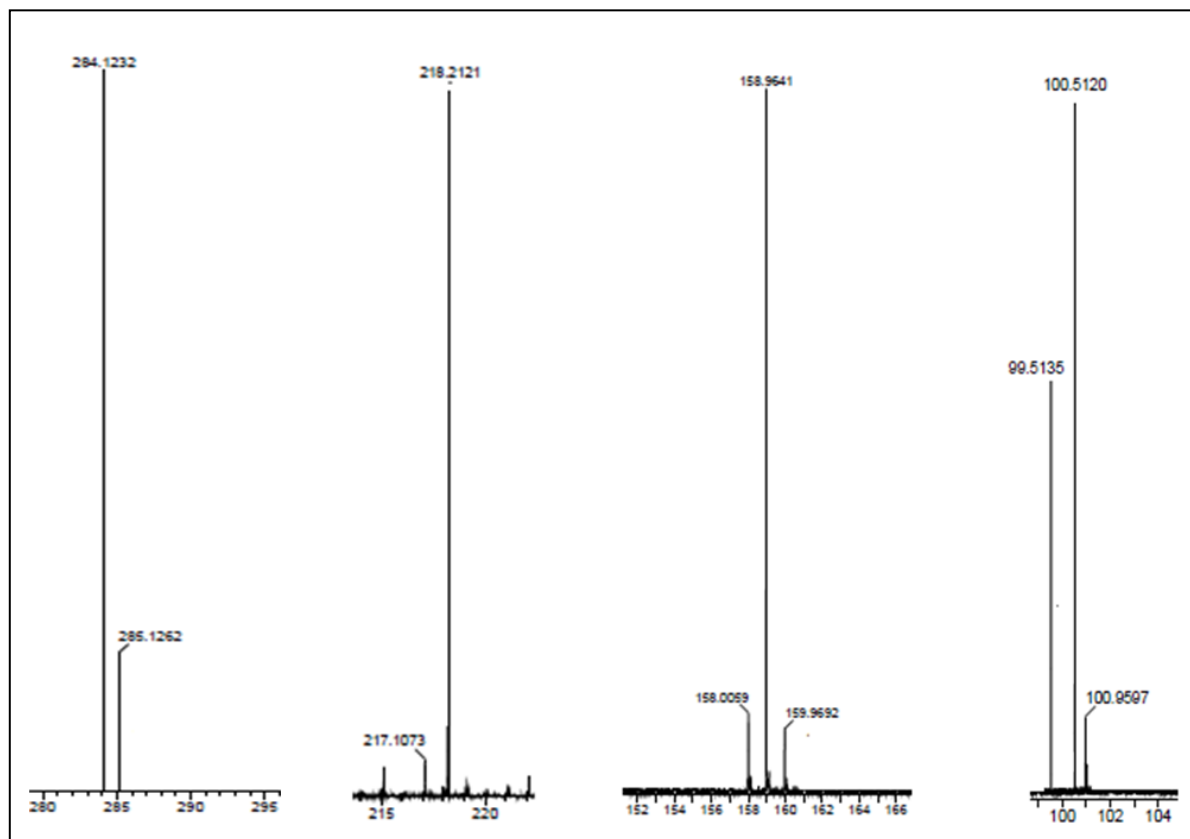

**Figure S10:** LC-MS chromatogram of Methylene Blue dye. LC showing the change in the area with time 't' and mass spectra showing the degraded products at various m/z values.

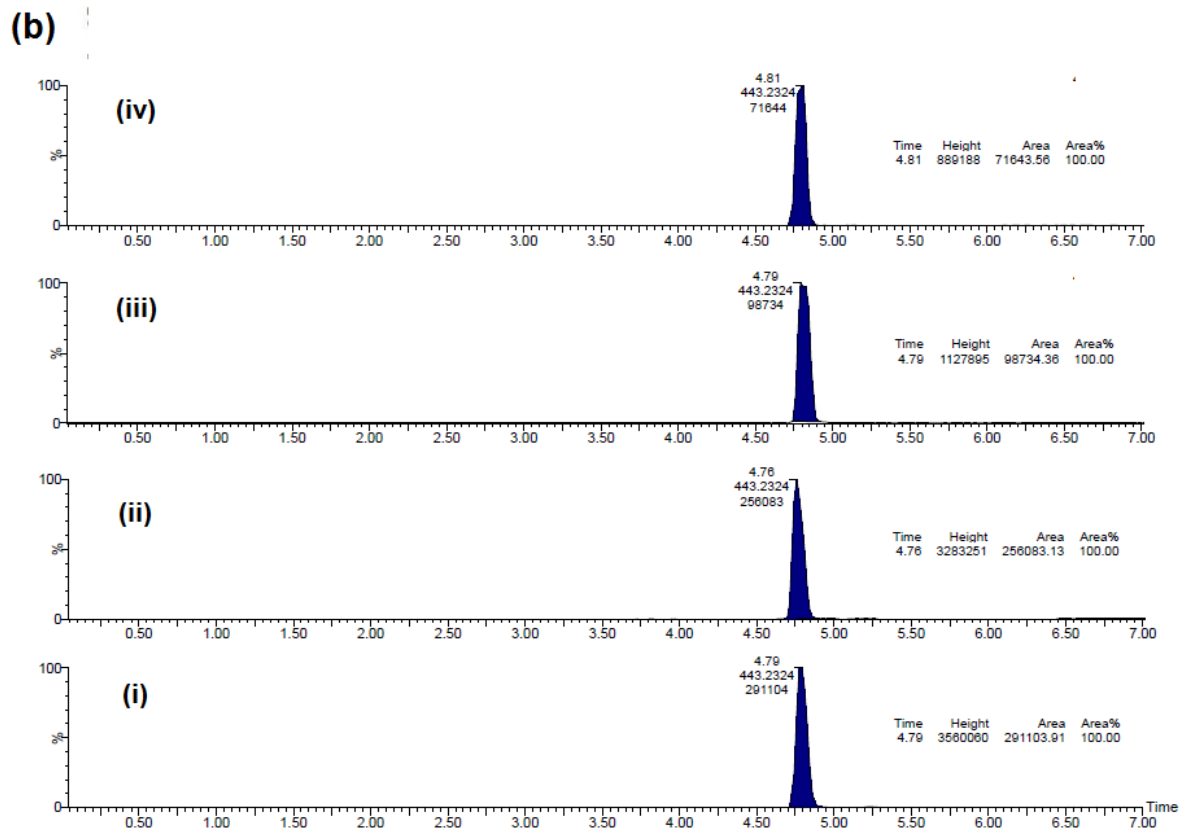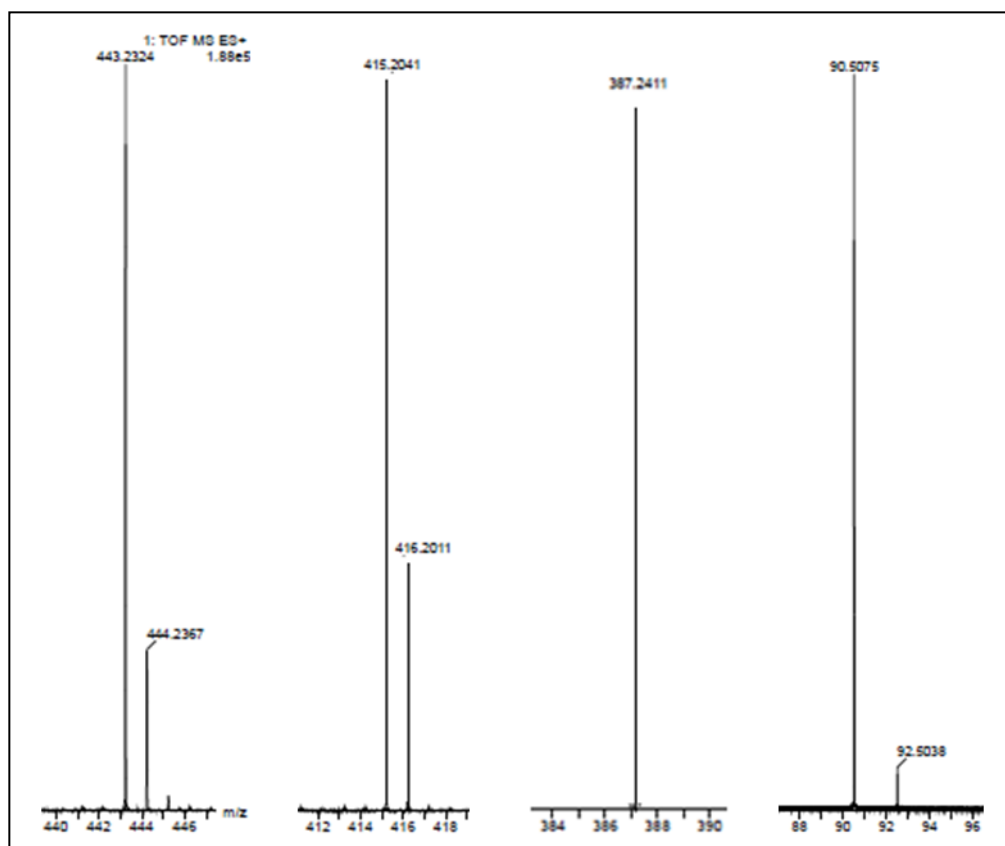

**Figure S11:** LC-MS chromatogram of Rhodamine B dye. LC showing the change in the area with time 't' and mass spectra showing the degraded products at various m/z values.

**Table S1:** Intermediates identified during the degradation of Methylene Blue dye

| <b>Product</b> | <b>MW</b> | <b>Name</b>                                         |
|----------------|-----------|-----------------------------------------------------|
| 1              | 284       | Methylene Blue                                      |
| 2              | 218       | 2-amino-5-(methylamino)-hydroxybenzenesulfonic acid |
| 3              | 158       | Benzenesulfonic acid                                |

**Table S2:** Intermediates identified during the degradation of Rhodamine-B dye

| <b>Product</b> | <b>MW</b> | <b>Name</b>                   |
|----------------|-----------|-------------------------------|
| 1              | 443       | Rhodamine-B                   |
| 2              | 415       | N,N-diethyl-N'-ethylrhodamine |
| 3              | 387       | N,N-diethylrhodamine          |
| 4              | 90        | 2-hydroxy propanoic acid      |
